# Supplementary material
Source: PubMed Central journal article supplement (PMC7610535)

Source Data Extended Data Fig. 1. Source data for Extended Data Figure 1

Extended Data Figure 1e

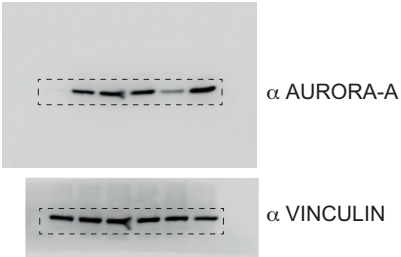

Extended Data Figure 1f

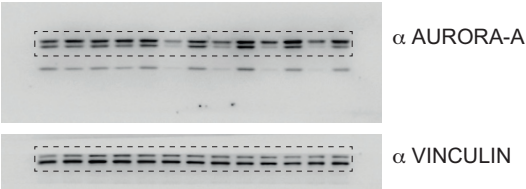

Extended Data Figure 1g

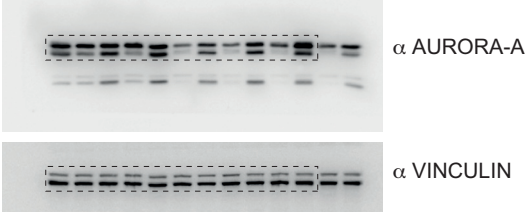

Supplement: EMS118351-supplement-Source_Data_Extended_Data_Fig__1.pdf [file EMS118351-supplement-Source_Data_Extended_Data_Fig__1.pdf]
