# Supplementary material
Source: PubMed Central journal article supplement (PMC7610535)

**Source Data Extended Data Fig. 3. Uncropped immunoblots for Extended Data Figure 3**

Extended Data Figure 3b

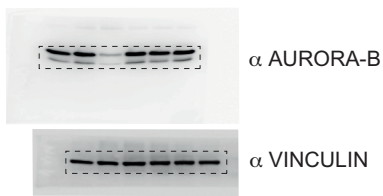

Extended Data Figure 3c

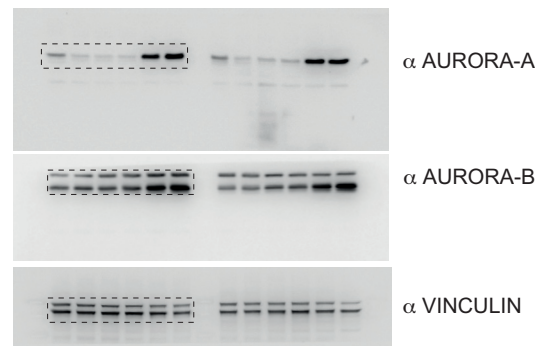

Extended Data Figure 3d

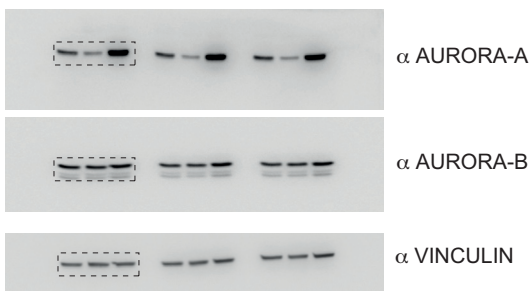

Extended Data Figure 3e

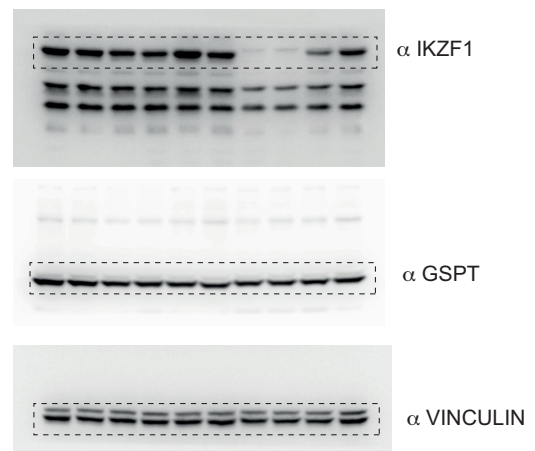

Supplement: EMS118351-supplement-Source_Data_Extended_Data_Fig__3.pdf [file EMS118351-supplement-Source_Data_Extended_Data_Fig__3.pdf]
