# Supplementary material
Source: PubMed Central journal article supplement (PMC7610535)

# Source Data Extended Data Fig. 5. Uncropped immunoblots for Extended Data Figure 5

## Extended Data Figure 5b

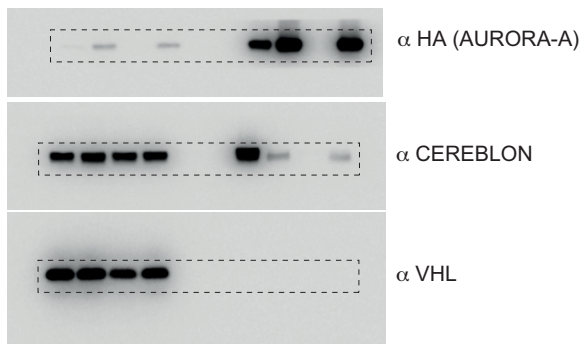

## Extended Data Figure 5c

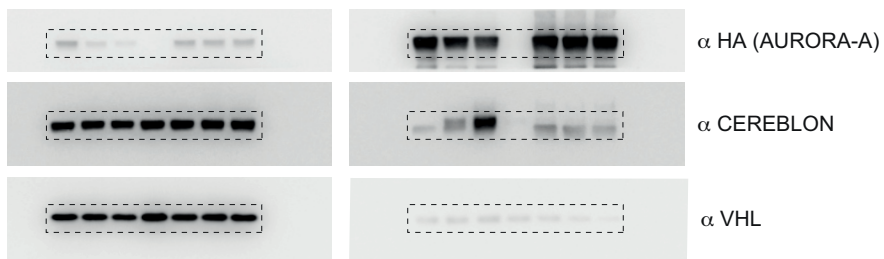

## Extended Data Figure 5d

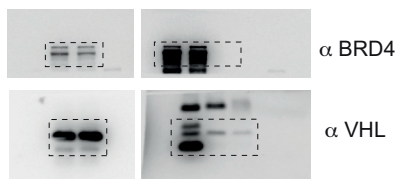

Supplement: EMS118351-supplement-Source_Data_Extended_Data_Fig__5.pdf [file EMS118351-supplement-Source_Data_Extended_Data_Fig__5.pdf]
