# Supplementary material
Source: PubMed Central journal article supplement (PMC7610535)

Source Data Fig. 1. Uncropped Immunoblots for Figure 1

Figure 1b

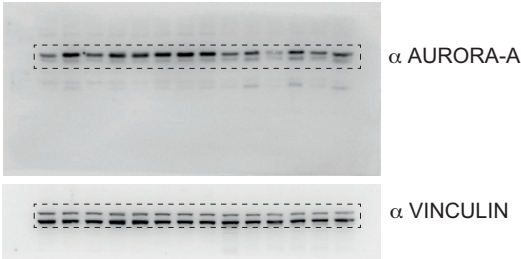

Supplement: EMS118351-supplement-Source_Data_Fig__1.pdf [file EMS118351-supplement-Source_Data_Fig__1.pdf]

**Source Data Fig. 2. Uncropped immunoblots for Figure 2**

Figure 2b

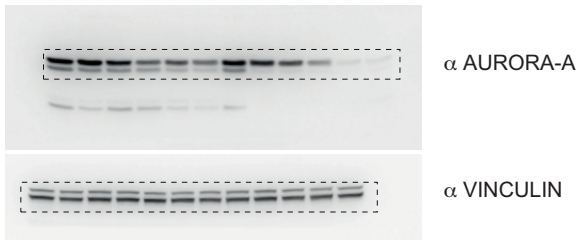

Figure 2c

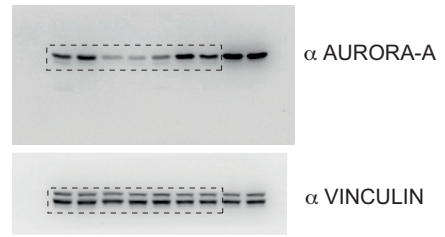

Figure 2d

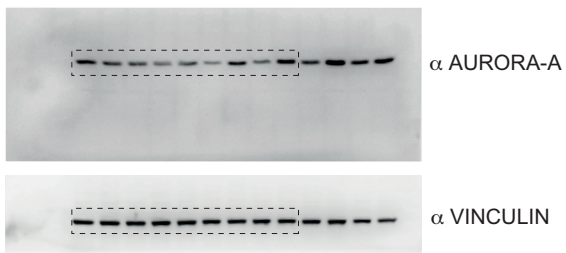

Supplement: EMS118351-supplement-Source_Data_Fig__2.pdf [file EMS118351-supplement-Source_Data_Fig__2.pdf]

**Source Data Fig. 4. Uncropped immunoblots for Figure 4**

**Figure 4a**

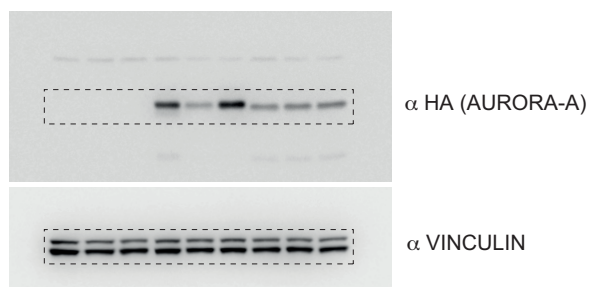

**Figure 4c**

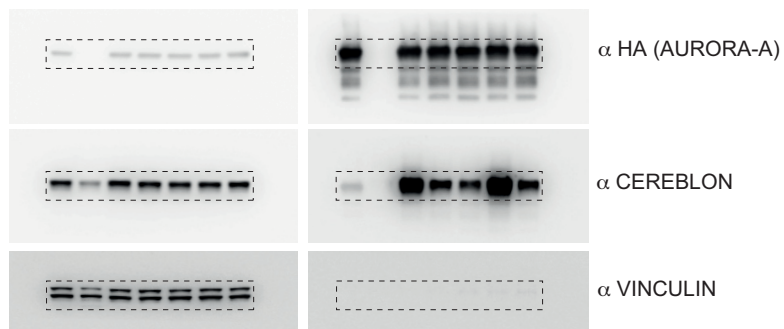

**Figure 4d**

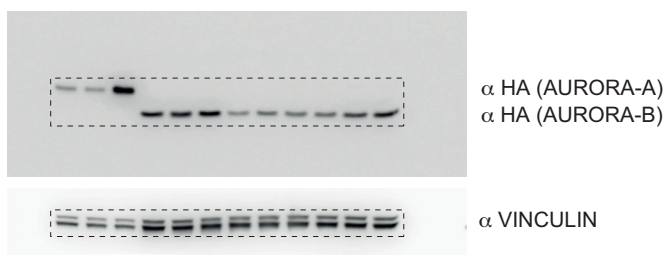

Supplement: EMS118351-supplement-Source_Data_Fig__4.pdf [file EMS118351-supplement-Source_Data_Fig__4.pdf]

**Source Data Fig. 5. Uncropped immunoblots for Figure 5**

Figure 5c (left)

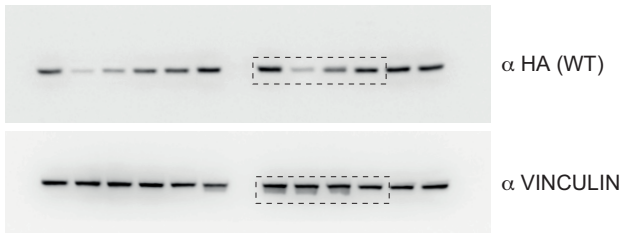

Figure 5c (right)

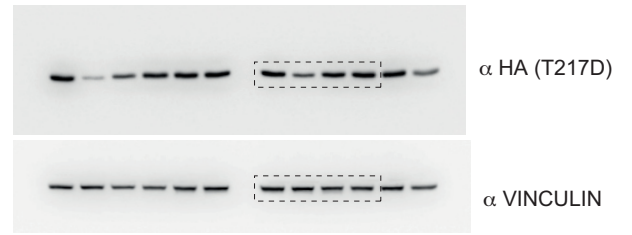

Figure 5d

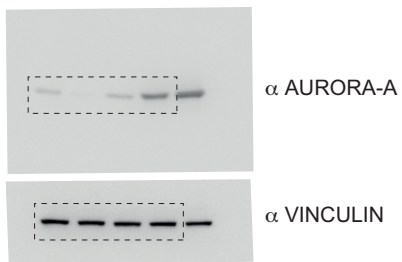

Figure 5g

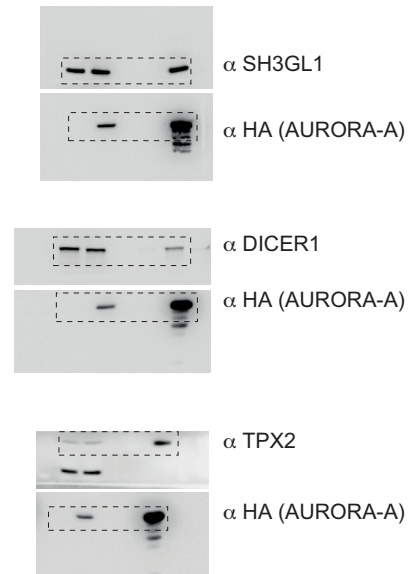

Supplement: EMS118351-supplement-Source_Data_Fig__5.pdf [file EMS118351-supplement-Source_Data_Fig__5.pdf]
